# Supplementary material for: Generation, expansion, gene delivery, and single-cell profiling in rhesus macaque plasma B cells
Source: PubMed Central journal article supplement (PMC11573788; doi:10.1016/j.crmeth.2024.100878), 2024-10-14
Supplement: mmc1.pdf [file mmc1.pdf]

**Cell Reports Methods, Volume 4**

**Supplemental information**

**Generation, expansion, gene delivery,  
and single-cell profiling  
in rhesus macaque plasma B cells**

**Rene Yu-Hong Cheng, Anna E. Helmers, Shannon Kreuser, Noelle Dahl, Yuchi Honaker, Christina Lopez, David J. Rawlings, and Richard G. James**

**Supplemental**

**Table S1: Staining Panels. Related to Figures 1, 5, and 7.**

| <b>Panel 1: Day 0 Purity assessment</b>                       |                    |              |                            |             |                 |
|---------------------------------------------------------------|--------------------|--------------|----------------------------|-------------|-----------------|
| <b>Antigen</b>                                                | <b>Fluorophore</b> | <b>Clone</b> | <b>Vendor</b>              | <b>Cat#</b> | <b>Dilution</b> |
| <b>Live Dead</b>                                              | AF350              | N/A          | Invitrogen                 | A10168      | 1:1000          |
| <b>CD20</b>                                                   | PerCP-Cy5.5        | L27          | BD Bioscience              | 340955      | 1:20            |
| <b>CD14</b>                                                   | APC-Cy7            | MoP9         | BD Bioscience              | 557831      | 1:200           |
| <b>CD56</b>                                                   | PE                 | MY31         | BD Bioscience              | 347747      | 1:200           |
| <b>CD4</b>                                                    | BV605              | L200         | BD Bioscience              | 562843      | 1:200           |
| <b>CD3</b>                                                    | A700               | SP34         | BD Bioscience              | 557917      | 1:200           |
| <b>Panel 2: Phenotyping and transduction efficiency panel</b> |                    |              |                            |             |                 |
| <b>Antigen</b>                                                | <b>Fluor</b>       | <b>Clone</b> | <b>Vendor</b>              | <b>Cat#</b> | <b>Dilution</b> |
| <b>Live Dead</b>                                              | AF350              | N/A          | Invitrogen                 | A10168      | 1:1000          |
| <b>CD20</b>                                                   | PerCP-Cy5.5        | L27          | BD Bioscience              | 340955      | 1:100           |
| <b>CD14</b>                                                   | APC-Cy7            | MoP9         | BD Bioscience              | 557831      | 1:200           |
| <b>CD31</b>                                                   | PE                 | WM59         | BD Bioscience              | 555446      | 1:100           |
| <b>CD38</b>                                                   | mFluor450          | OKT10        | Caprico<br>Biotechnologies | 1008144     | 1:100           |
| <b>CD3</b>                                                    | AF700              | SP34         | BD Bioscience              | 557917      | 1:200           |
| <b>Transduction</b>                                           | GFP                | --           | ---                        |             | ---             |
| <b>Panel 3: Phenotyping and intracellular Ig staining</b>     |                    |              |                            |             |                 |
| <b>Antigen</b>                                                | <b>Fluor</b>       | <b>Clone</b> | <b>Vendor</b>              | <b>Cat#</b> | <b>Dilution</b> |
| <b>Live Dead</b>                                              | AF350              | N/A          | Invitrogen                 | A10168      | 1:1000          |
| <b>CD20</b>                                                   | PerCP-Cy5.5        | L27          | BD Bioscience              | 340955      | 1:20            |
| <b>CD14</b>                                                   | APC-Cy7            | MoP9         | BD Bioscience              | 557831      | 1:200           |
| <b>CD138</b>                                                  | PE                 | DL-101       | Biologend                  | 352306      | 1:100           |

|               |           |         |                            |           |       |
|---------------|-----------|---------|----------------------------|-----------|-------|
| <b>CD38</b>   | mFluor450 | OKT10   | Caprico<br>Biotechnologies | 1008144   | 1:50  |
| <b>CD38</b>   | FITC      | OKT10   | Caprico<br>Biotechnologies | 100815    | 1:200 |
| <b>CD3</b>    | APC-Cy7   | SP34    | BD Bioscience              | 557917    | 1:200 |
| <b>CD31</b>   | BV605     | WM59    | Biolegend                  | 303122    | 1:100 |
| <b>CD59</b>   | APC       | p282    | Biolegend                  | 304712    | 1:50  |
| <b>CD79A</b>  | BV421     | HM47    | BD Bioscience              | BDB566225 | 1:200 |
| <b>IgG-ic</b> | AF700     | G18-145 | BD Bioscience              | 561296    | 1:200 |
| <b>IgM-ic</b> | FITC      | G20-127 | BD Bioscience              | 555782    | 1:200 |

**Table S2: AAV transduction with different titers. Related to Figure 7.**

|    |                                                       | DAY 5 |        |                |
|----|-------------------------------------------------------|-------|--------|----------------|
|    |                                                       | 698   | A17104 | relative titer |
|    | no AAV                                                | 1.55  | 0.58   | 0              |
| 1  | scAAV1                                                | 9.41  | 2.33   | 0.664063       |
| 2  | AAV2                                                  | 18.4  | 9.41   | 1              |
| 3  | AAV2.5                                                | 11.2  | 6.36   | 0.46875        |
| 4  | scAAV6                                                | 9.46  | 2.09   | 0.086328       |
| 5  | AAVD-J                                                | 22    | 9.92   | 1.757813       |
| 6  | AAV5                                                  | 28.4  | 12.3   | 4.84375        |
| 7  | AAV8                                                  | 7.48  | 1.75   | 2.402344       |
| 8  | AAV9                                                  | 3.96  | 0.99   | 2.773438       |
| 9  | AAVRh.8                                               | 1.1   | 0.36   | 0.332031       |
| 10 | AAV11cap11                                            | 0.91  | 0.34   | 0.214844       |
| 11 | AAVcap11                                              | 0.94  | 0.4    | 0.46875        |
| 12 | AAV HSC7                                              | 1.8   | 0.59   | 0.992188       |
| 13 | AAV1110 pLT AAV Help<br>(AAV2) Y444F, Y500F,<br>Y730F | 16.2  | 6.95   | 0.5            |
|    |                                                       | DAY 7 |        |                |
|    |                                                       | 698   | A17104 | relative titer |
|    | no AAV                                                | 2.42  | 1.05   | 0              |
| 1  | scAAV1                                                | 5.91  | 2.34   | 0.664063       |
| 2  | AAV2                                                  | 26.5  | 23.9   | 1              |
| 3  | AAV2.5                                                | 14.6  | 11.3   | 0.46875        |
| 4  | scAAV6                                                | 6.74  | 1.82   | 0.086328       |
| 5  | AAVD-J                                                | 33.7  | 23.2   | 1.757813       |
| 6  | AAV5                                                  | 26.2  | 14.5   | 4.84375        |
| 7  | AAV8                                                  | 5.18  | 2.18   | 2.402344       |
| 8  | AAV9                                                  | 3.2   | 1.9    | 2.773438       |

|           |                                                       |        |        |                |
|-----------|-------------------------------------------------------|--------|--------|----------------|
| <b>13</b> | AAV1110 pLT AAV Help<br>(AAV2) Y444F, Y500F,<br>Y730F | 19     | 13.7   | 0.332031       |
|           |                                                       | DAY 10 |        |                |
|           |                                                       | 698    | A17104 | relative titer |
|           | no AAV                                                | 7.27   | 1.63   | 0              |
| <b>1</b>  | scAAV1                                                | 3.28   | 1.37   | 0.664063       |
| <b>2</b>  | AAV2                                                  | 21.5   | 21.1   | 1              |
| <b>3</b>  | AAV2.5                                                | 10.4   | 8.34   | 0.46875        |
| <b>4</b>  | scAAV6                                                | 3.78   | 1.3    | 0.086328       |
| <b>5</b>  | AAVD-J                                                | 35.6   | 26.4   | 1.757813       |
| <b>6</b>  | AAV5                                                  | 22.9   | 14.5   | 4.84375        |
| <b>7</b>  | AAV8                                                  | 4.27   | 2.11   | 2.402344       |
| <b>8</b>  | AAV9                                                  | 2.92   | 1.58   | 2.773438       |
| <b>13</b> | AAV1110 pLT AAV Help<br>(AAV2) Y444F, Y500F,<br>Y730F | 12.5   | 10.5   | 0.332031       |

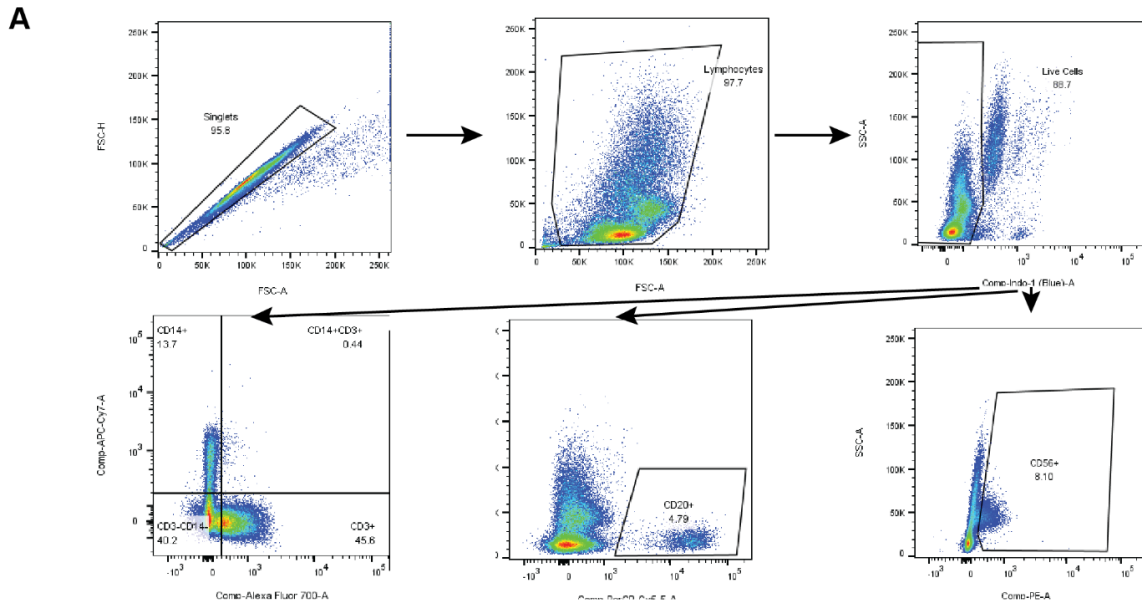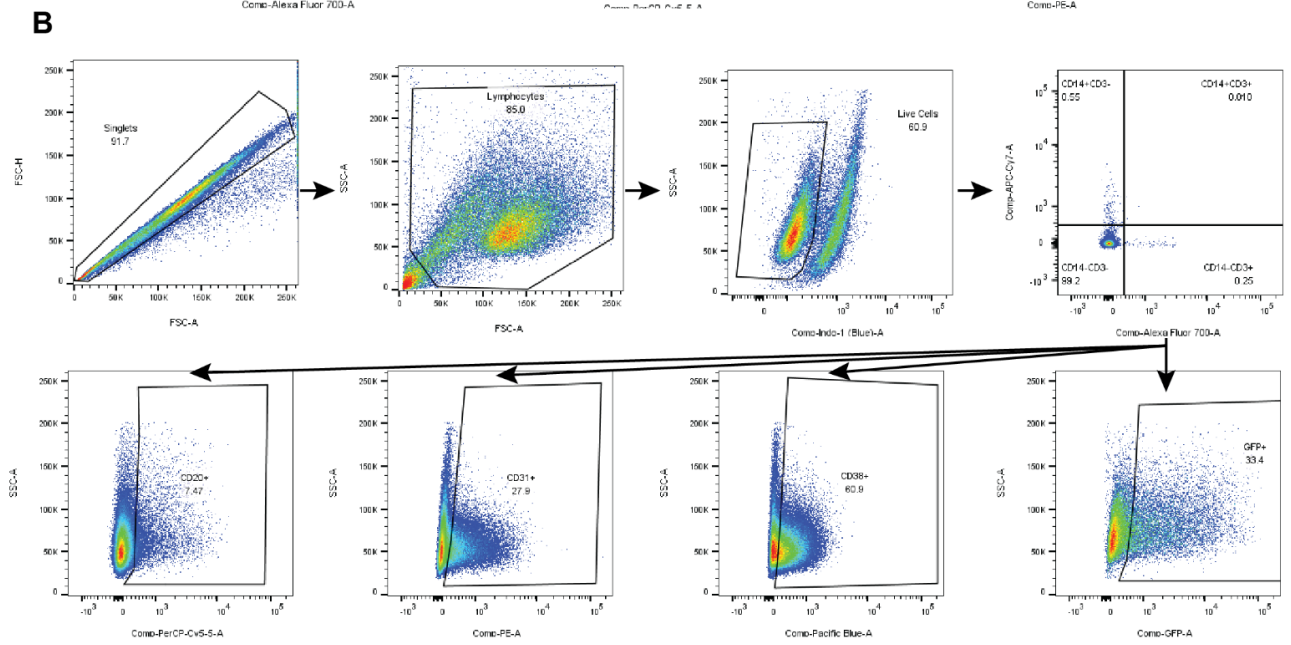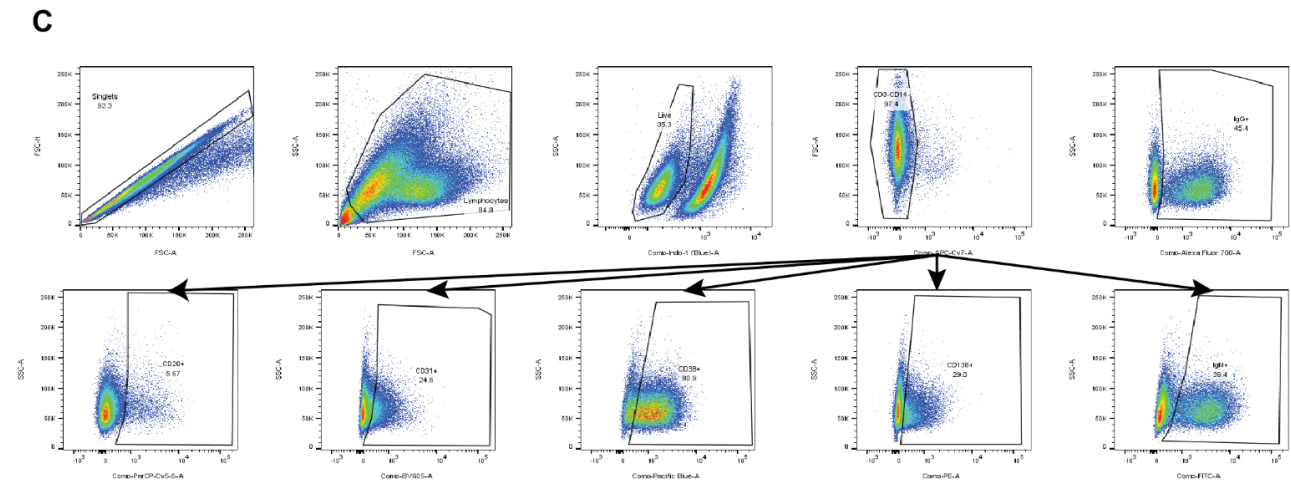

**Figure S1. Flow cytometry gating strategy. Related to Figures 1, 5, and 7. A.** Gating scheme for flow cytometry Panel 1 (Table S1) to determine purity at the time of isolation. **B.** Gating scheme for flow cytometry Panel 2 (Table S1) to determine B cell phenotype and transduction efficiency through GFP expression. **C.** Gating scheme for flow cytometry Panel 3 (Table S1) to determine B cell phenotype and intracellular Ig production.

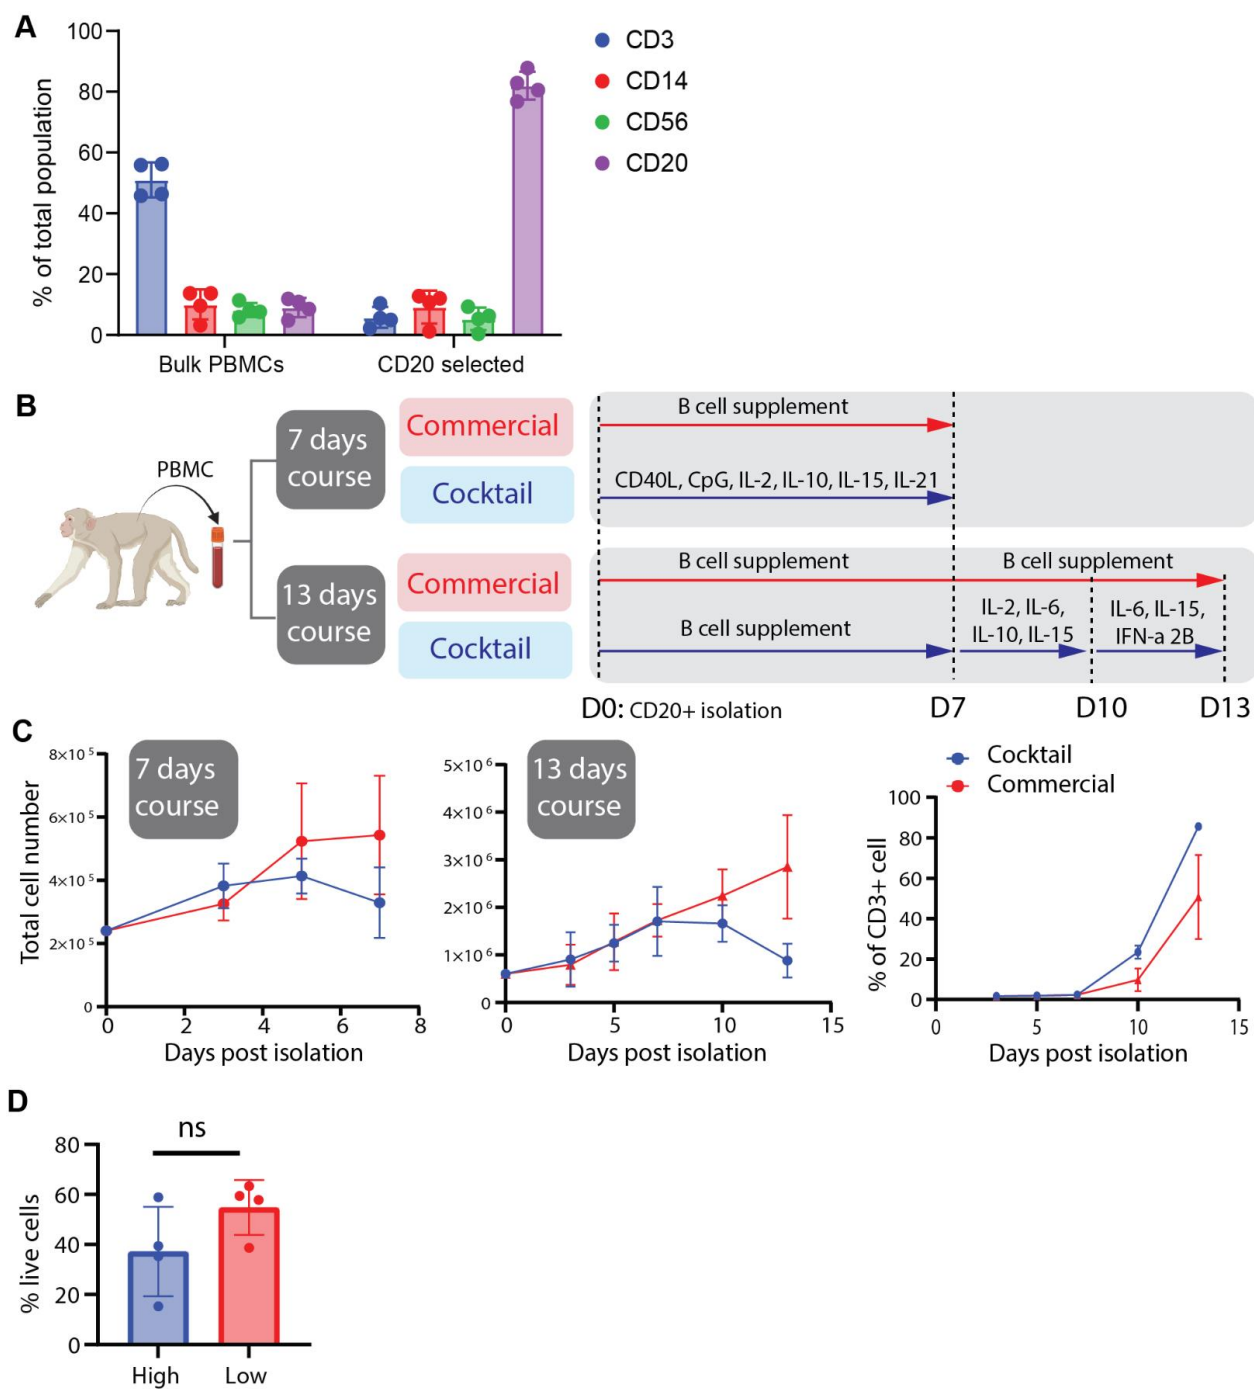

**Figure S2. Method of ex vivo expansion and differentiated NHP PCs. Related to Figure 1. A.**

Following isolation of CD20+ Rhesus B cells from PBMCs, we assessed cell purity via flow cytometry using the indicated antibodies (4 donors, n=4). **B.** Schematic workflow of monkey *ex vivo* differentiated PC generation with two different time course and two different conditions. **C.** CD20+ NHP B cells were cultured for 7 days/13 days with defined cocktail or commercial expansion medium ( $1.5-1 \times 10^6$  cells/mL) (3 donors, n=3), Total cells were counted on days 3, 5, and 7 (left and middle). Percentage of contaminating



T cells cells (CD3+, left). **D.** To assess the impact of cell density, CD20+ NHP B cells were cultured in the commercial B cell medium for 7 days (Plated and maintained  $1.5 \times 10^6$  cells/mL versus plated at  $2.5 \times 10^5$  cells/mL and maintained at  $1 \times 10^5$  cells/mL; 4 donors, n=3). At day 7 following isolation, the percent viability was analyzed using flow cytometry. Data presented as individual data points and error bar represent standard deviation.

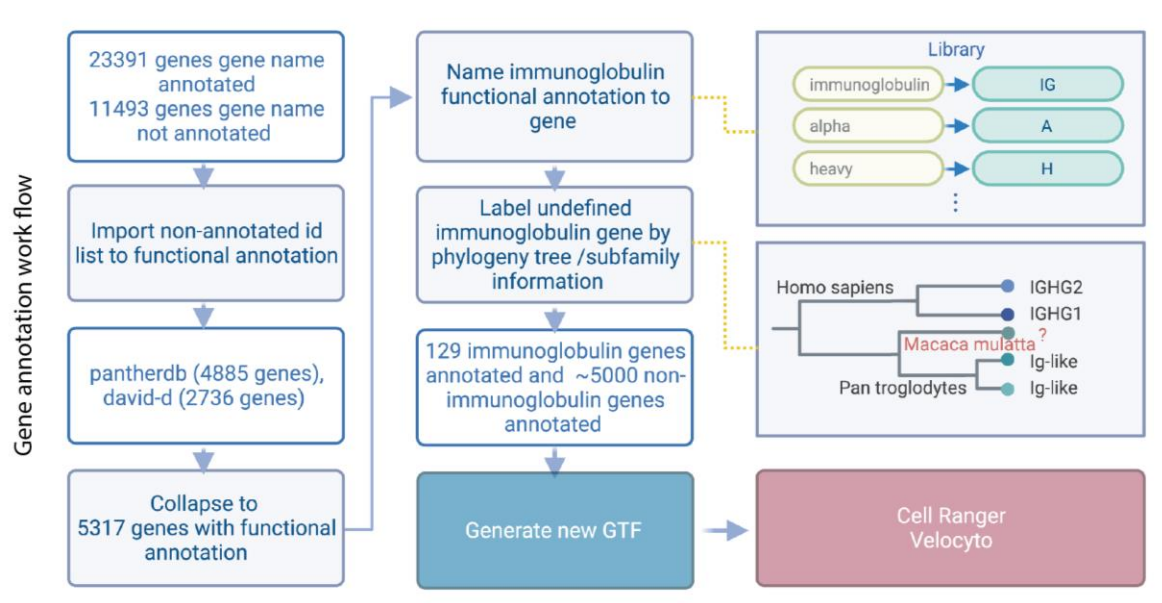

**Figure S3. Monkey (*Macaca mulatta*) gene annotation workflow. Related to Figure 1.** Gene annotation workflow. (GTF: Gene transfer format, *Macaca\_mulatta*.Mmul\_10.104.chr.gtf, generated new GTF: genes.gtf)

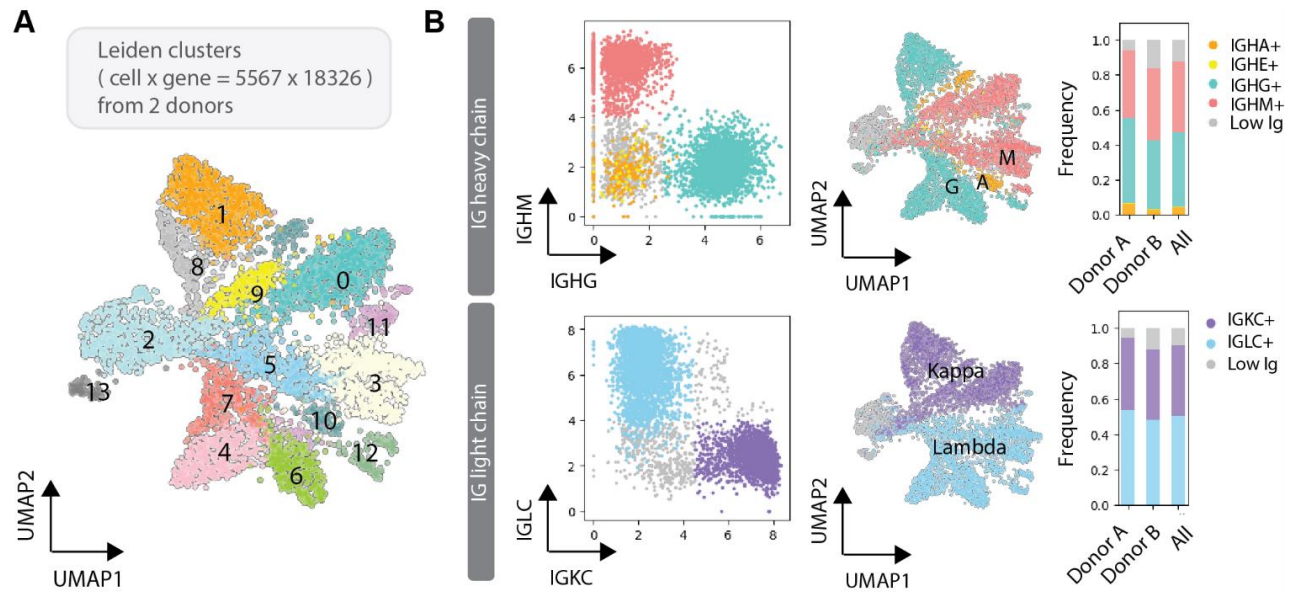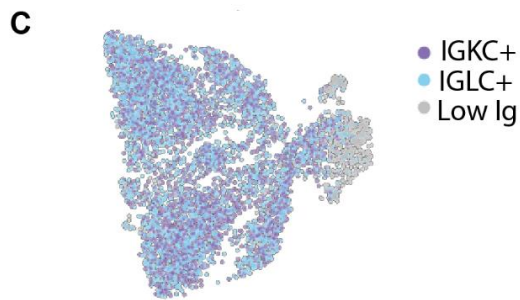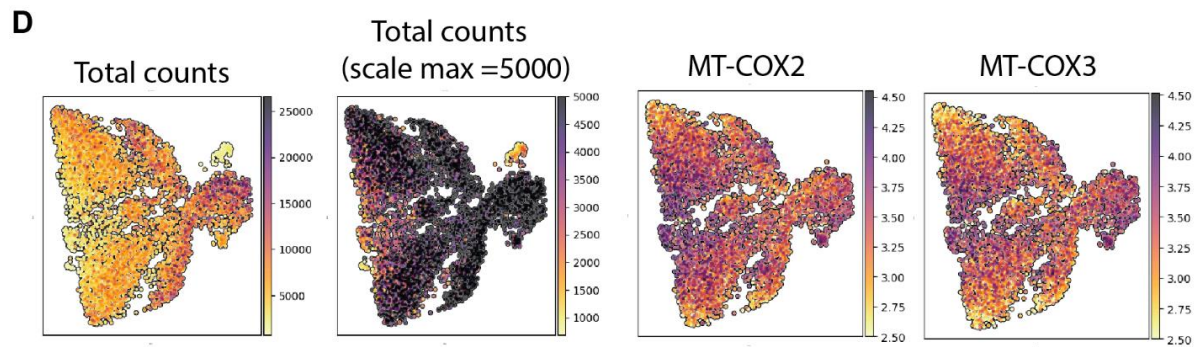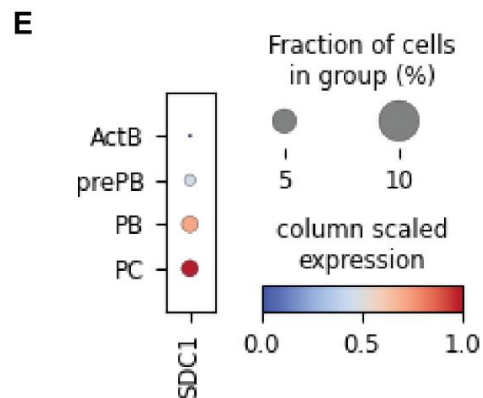

**Figure S4. Monkey *ex vivo* differentiated PCs subsets classification and differential expression analysis for PCs. Related to Figures 1, 2, and 3.** **A.** Single cell graph UMAP dimension-reduction projection of day13 B cells (n = 5567) from two biological replicates. **B.** Classification of immunoglobulin heavy chain (upper panel) and light chain (lower panel). UMAP projection of the subclass of IGHG+, IGHA+, IGHM+ cells (upper panel) and IGKC+, IGLC+ cells (lower panel), and bar graph represent the percentage of subclasses from two individual donor. **C.** UMAP projection of IGKC+, IGLC+ cells in LC-independent clusters. **D.** Heatmap showing total count and expression of representative MT genes in LC-independent clusters. **E.** Dotplot visualization of *ex vivo* differentiated monkey PCs: subsets are listed on y-axis and SDC1 (CD138) gene on x-axis.

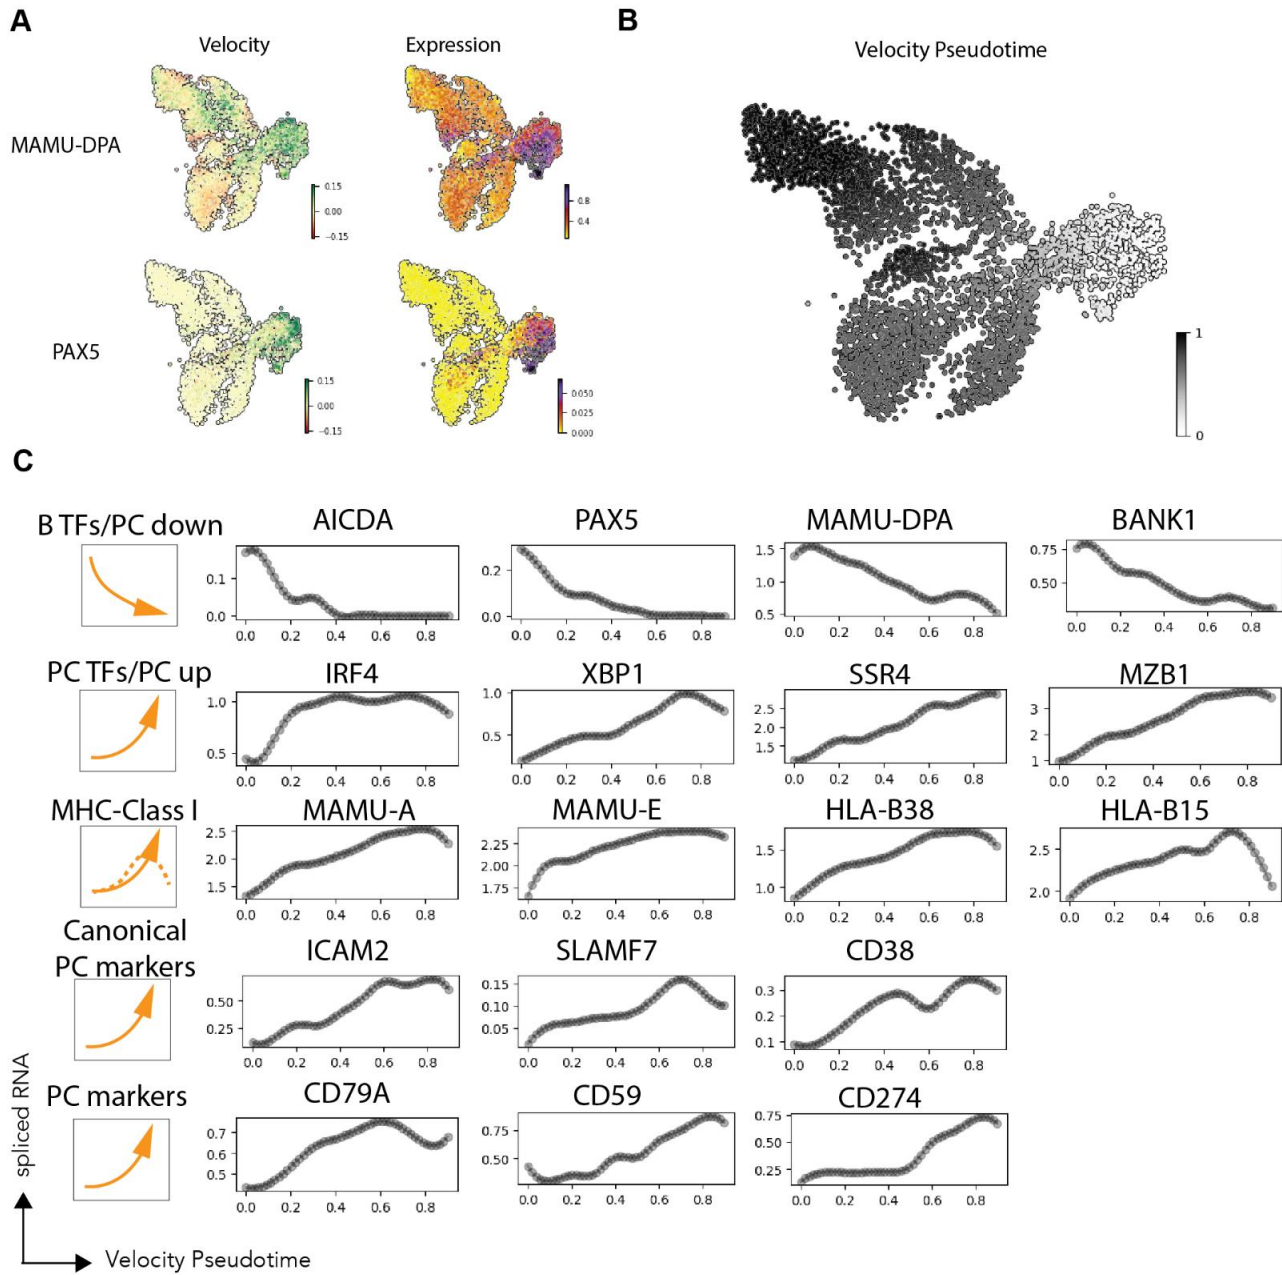

**D**

|               | <i>fit_diff_kinetics</i> | <i>fit_pval_kinetics</i> |
|---------------|--------------------------|--------------------------|
| <b>EZH2</b>   | ActB                     | 1.70e-08                 |
| <b>TUBA1A</b> | ActB                     | 1.97e-06                 |
| <b>BIRC3</b>  | prePB                    | 1.08e-03                 |
| <b>MAN1A1</b> | mPC                      | 1.56e-04                 |
| <b>FUT8</b>   | aPC                      | 8.95e-03                 |
| <b>FNDC3A</b> | aPC                      | 6.73e-04                 |
| <b>IGF1</b>   | gPC                      | 3.10e-03                 |
| <b>CD274</b>  | gPC                      | 2.30e-06                 |

**Figure S5. RNA velocity of immunoglobulin and kinetic differentiation analysis. Related to Figure 4.** **A.** Heatmap of indicated gene velocity and RNA expression level superimposed on to UMAP. **B.** Heatmap of velocity pseudotime superimposed on to UMAP. **C.** Scatter plot of indicated genes with velocity pseudotime and mean of spliced mRNA in every 0.1 pseudotime. **D.** scVelo kinetic differentiation analysis.

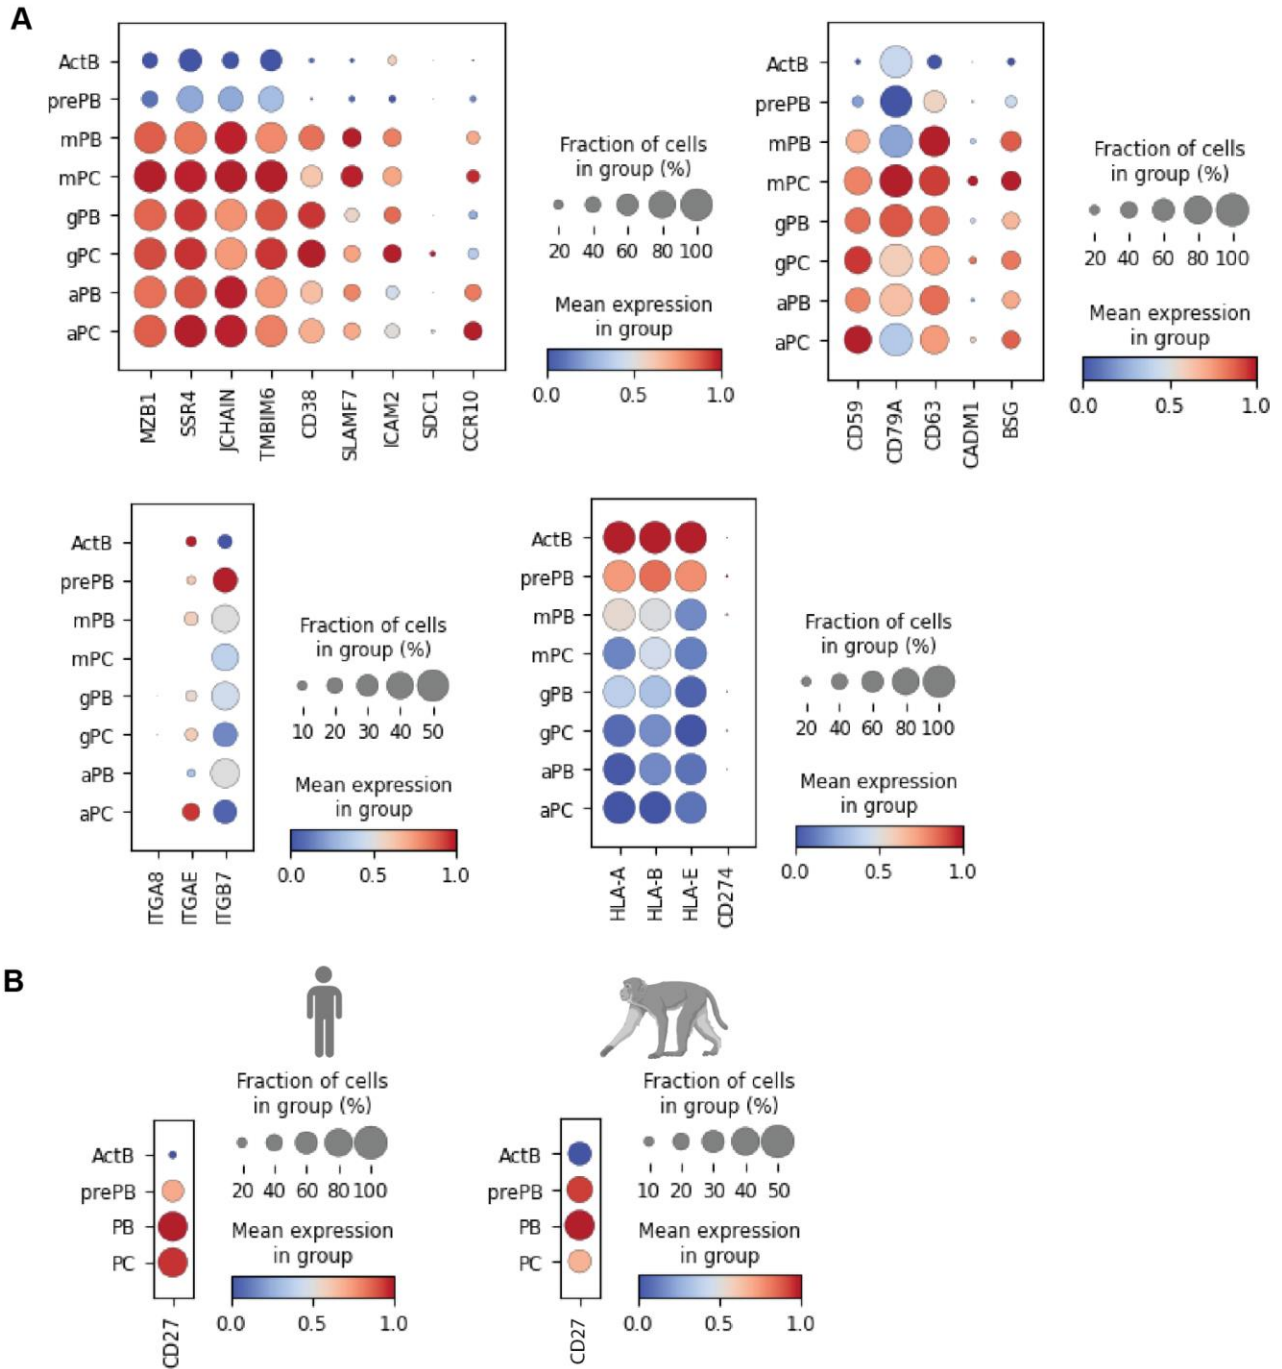

**Figure S6. Comparison of human and monkey PC makers by scRNAseq analysis. Related to Figure 6. A.** Dotplot visualization of *ex vivo* differentiated human PC: subsets with different isotypes are listed on y-axis and representative genes from Fig. 3D are listed along the x-axis. **B.** Dotplot visualization of *ex vivo* differentiated human and monkey PC: subsets are listed on y-axis and CD27 gene on x-axis.

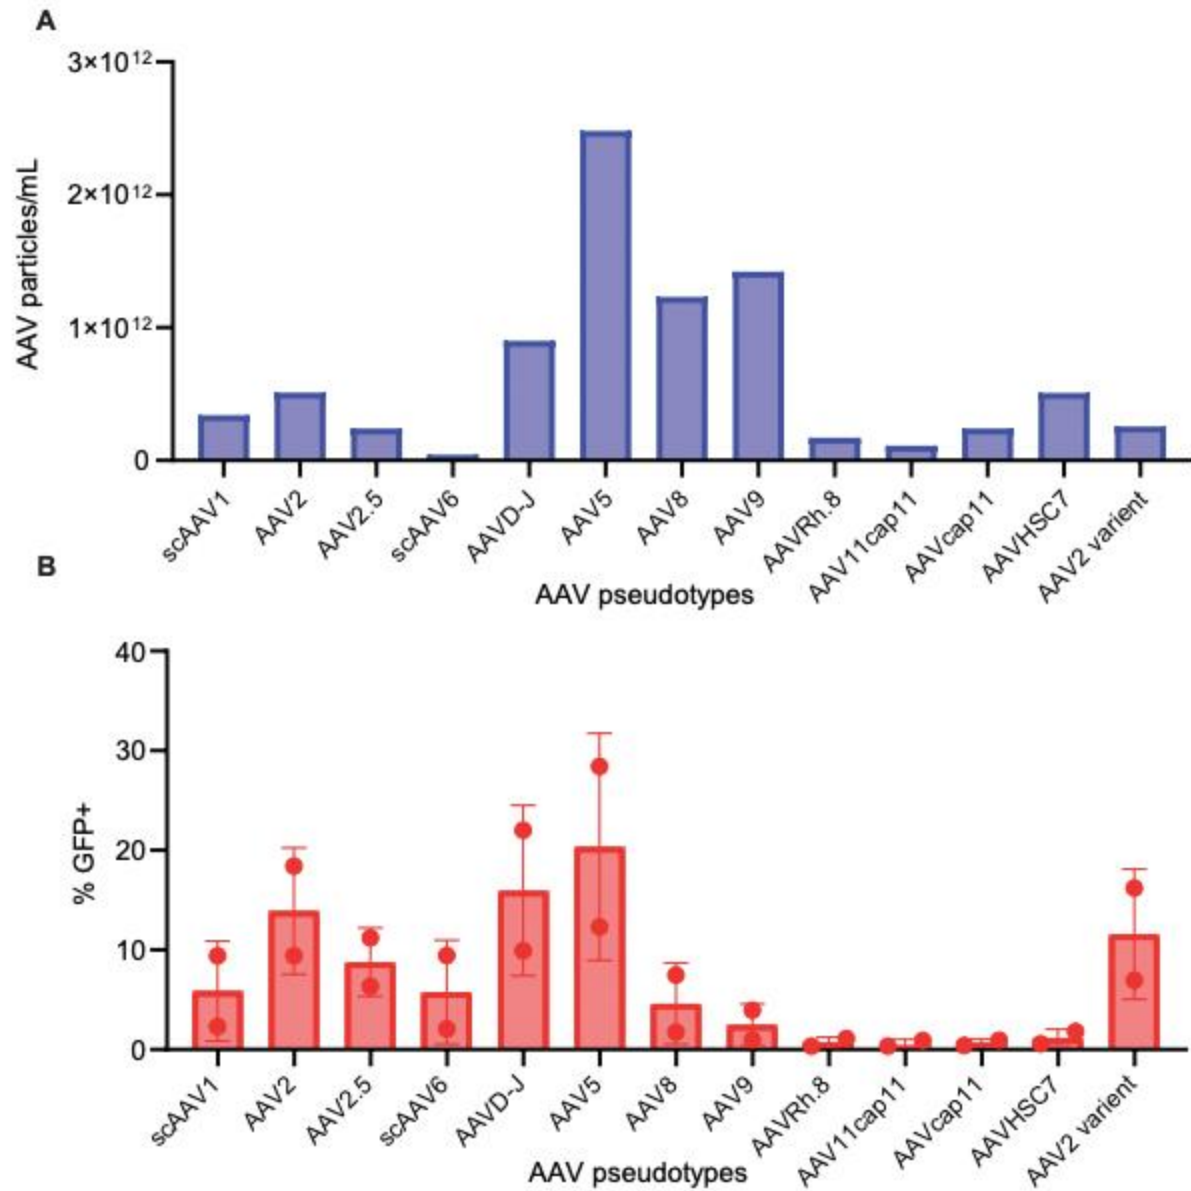

**Figure S7. NHP B cell transduction with AAV. Related to Figure 5.** A-B NHP B cells were transduced on day 3 of culture. 20% by volume was added of GFP encapsulated in different AAV pseudotypes, with varying titers **A.** and flow for GFP+ **B.** was run 2 days later.
